# Supplementary material for: Personalised Online Upper-Limb Physiotherapy for Stroke Survivors during the Inpatient Phase: A Feasibility Study
Source: MDPI journal article supplement (doi:10.3390/healthcare11182582), 2023-09-19
Supplement: s1 [file s1]

**Section 1:** Evaluation of the augmented exercise programme:

| Question number | Question                                                                                 | Please circle one answer |                         |                               |                      |                    |
|-----------------|------------------------------------------------------------------------------------------|--------------------------|-------------------------|-------------------------------|----------------------|--------------------|
| 1.              | I think the stroke survivors benefited from the exercise programme.                      | Strongly disagree [0]    | Moderately disagree [1] | Neither agree or disagree [2] | Moderately agree [3] | Strongly agree [4] |
| 2.              | Monitoring the augmented programme did not impose on my day to day care of the patients. | Strongly disagree [0]    | Moderately disagree [1] | Neither agree or disagree [2] | Moderately agree [3] | Strongly agree [4] |
| 3.              | The exercises were clear and understandable to the stroke patients.                      | Strongly disagree [0]    | Moderately disagree [1] | Neither agree or disagree [2] | Moderately agree [3] | Strongly agree [4] |
| 4.              | I would be happy to provide exercises using this website again in the future.            | Strongly disagree [0]    | Moderately disagree [1] | Neither agree or disagree [2] | Moderately agree [3] | Strongly agree [4] |

**Section 2:** Evaluation of the website

| Question number | Question                                                                              | Please circle one answer |                         |                               |                      |                    |
|-----------------|---------------------------------------------------------------------------------------|--------------------------|-------------------------|-------------------------------|----------------------|--------------------|
| 5.              | Learning to provide exercises using the website was easy for me.                      | Strongly disagree [0]    | Moderately disagree [1] | Neither agree or disagree [2] | Moderately agree [3] | Strongly agree [4] |
| 6.              | The procedure of signing the stroke survivors up to the website was straight forward. | Strongly disagree [0]    | Moderately disagree [1] | Neither agree or disagree [2] | Moderately agree [3] | Strongly agree [4] |
