# Supplementary material for: Personalised Online Upper-Limb Physiotherapy for Stroke Survivors during the Inpatient Phase: A Feasibility Study
Source: MDPI journal article supplement (doi:10.3390/healthcare11182582), 2023-09-19
Supplement: s1 [file s1]

---

**1. Did you do any of the exercises in your programme?    Yes [0] ☐    No [1] ☐**

---

**If you answered 'Yes', please go straight to Question 2.**

**If you answered 'No', could you please let us know why that was?**

**Enter your comments here:**

**(Thanks for your feedback – there is no need to answer further questions)**

---

**Section 1: Evaluation of the augmented exercise programme:**

| Question number | Question                                                                     | Please circle one answer |                         |                               |                      |                    |
|-----------------|------------------------------------------------------------------------------|--------------------------|-------------------------|-------------------------------|----------------------|--------------------|
| 2.              | I feel I benefited from the exercise programme.                              | Strongly disagree [0]    | Moderately disagree [1] | Neither agree or disagree [2] | Moderately agree [3] | Strongly agree [4] |
| 3.              | The exercises were clear and understandable.                                 | Strongly disagree [0]    | Moderately disagree [1] | Neither agree or disagree [2] | Moderately agree [3] | Strongly agree [4] |
| 4.              | The exercise programme did not increase my fatigue (tiredness).              | Strongly disagree [0]    | Moderately disagree [1] | Neither agree or disagree [2] | Moderately agree [3] | Strongly agree [4] |
| 5.              | It was easy to contact the physios to make changes to my exercise programme. | Strongly disagree [0]    | Moderately disagree [1] | Neither agree or disagree [2] | Moderately agree [3] | Strongly agree [4] |
| 6.              | I was happy with the length of time it took for the study assessments.       | Strongly disagree [0]    | Moderately disagree [1] | Neither agree or disagree [2] | Moderately agree [3] | Strongly agree [4] |
| 7.              | I would be happy to do exercises using this website again in the future.     | Strongly disagree [0]    | Moderately disagree [1] | Neither agree or disagree [2] | Moderately agree [3] | Strongly agree [4] |

## Section 2: Evaluation of the website

| Question number | Question                                                                                       | Please circle one answer |                         |                               |                      |                    |
|-----------------|------------------------------------------------------------------------------------------------|--------------------------|-------------------------|-------------------------------|----------------------|--------------------|
|                 |                                                                                                | Strongly disagree [0]    | Moderately disagree [1] | Neither agree or disagree [2] | Moderately agree [3] | Strongly agree [4] |
| 8.              | Doing my exercises through the website gave me the chance to choose when to exercise.          |                          |                         |                               |                      |                    |
| 9.              | Doing my exercises through the website gave me the feeling of being independent in exercising. |                          |                         |                               |                      |                    |
| 10.             | Learning to use the website for my exercises was easy for me.                                  |                          |                         |                               |                      |                    |

## Section 3: Please answer the following questions and add your comments, if appropriate:

11. On average, how many times each week did you do your exercise?

Once per week [0] ☐      Twice per week [1] ☐      3-5 times per week [2] ☐      Other [3], please specify:.....

12. On average, how long did you spend doing the exercises each exercise session?

Less than 30 minutes [0] ☐      Up to 1 hour [1] ☐      1-2 hours [2] ☐      Other [3], please specify:.....

**13. Did your partner/relative help you do your exercise programme? Yes [0] ☐ No [1] ☐ If yes, please answer the following questions:**

**How often?** Once per week [0] ☐ Twice per week [1] ☐ 3-5 times per week [2] ☐ Other [3], please specify:.....

**What did you need your partner/relative to help you with?**

**14. Did you ask staff to help you do your exercise programme? Yes [0] ☐ No [1] ☐ If yes, please answer the following questions:**

**How often?** Once per week [0] ☐ Twice per week [1] ☐ 3-5 times per week [2] ☐ Other [3], please specify:.....

**Who did you ask?** Nursing staff [0] ☐ Physiotherapy staff [1] ☐ Other [2], please specify:.....

**What did you need the staff to help you with?**

15. How difficult/easy was exercising using the website without supervision? Easy [0] ☐ Neither easy nor difficult [1] ☐  
Difficult [2] ☐

**Please provide details. For example, did you worry about not exercising properly or knowing how many exercises you needed to do?**

**Please tell us about things that went well? What was difficult (if anything)?**

**16. Only for participants who have problems with speech, memory and thinking (aphasia)**

Was the website aphasia version helpful?

Certainly yes [0] ☐ To a large extent [1] ☐ To some extent [2] ☐ No [3] ☐ I didn't  
use it [4] ☐

17. Did you discuss your exercises with other patients? Yes [0] ☐ No [1] ☐

18. Did other patients ask you about your exercises? Yes [0] ☐ No [1] ☐
