# Supplementary material for: Personalised Online Upper-Limb Physiotherapy for Stroke Survivors during the Inpatient Phase: A Feasibility Study
Source: MDPI journal article supplement (doi:10.3390/healthcare11182582), 2023-09-19
Supplement: s1 [file s1]

**Please answer the following questions and add your comments, if appropriate:**

**1.** Did you help your partner/relative to do any of his/her exercise programme? Yes [0] ☐ No [1] ☐

**If you answered 'Yes', please go straight to Question 2.**

**If you answered 'No', could you please let us know why that was?**

Enter your comments here:

**(Thanks for your feedback – there is no need to answer further questions)**

**Section 1:** Evaluation of the augmented exercise programme:

| Question number | Question                                                                                         | Please circle one answer |                         |                               |                      |                    |
|-----------------|--------------------------------------------------------------------------------------------------|--------------------------|-------------------------|-------------------------------|----------------------|--------------------|
|                 |                                                                                                  | Strongly disagree [0]    | Moderately disagree [1] | Neither agree or disagree [2] | Moderately agree [3] | Strongly agree [4] |
| <b>2.</b>       | It was easy for me to help my partner/relative to do the exercises.                              | Strongly disagree [0]    | Moderately disagree [1] | Neither agree or disagree [2] | Moderately agree [3] | Strongly agree [4] |
| <b>3.</b>       | The exercises were clear and understandable.                                                     | Strongly disagree [0]    | Moderately disagree [1] | Neither agree or disagree [2] | Moderately agree [3] | Strongly agree [4] |
| <b>4.</b>       | I would be happy to use this website to help my relative/partner exercising again in the future. | Strongly disagree [0]    | Moderately disagree [1] | Neither agree or disagree [2] | Moderately agree [3] | Strongly agree [4] |

**Section 2:** Evaluation of the website:

| Question number | Question                                                                         | Please circle one answer |                         |                               |                      |                    |
|-----------------|----------------------------------------------------------------------------------|--------------------------|-------------------------|-------------------------------|----------------------|--------------------|
| 5.              | Learning to use the website for my partner/relative's exercises was easy for me. | Strongly disagree [0]    | Moderately disagree [1] | Neither agree or disagree [2] | Moderately agree [3] | Strongly agree [4] |

**Section 3: please answer the following questions and add your comments, if appropriate:**

**6.** How often did you help your partner/relative to do his/her exercise programme?

Once per week [0] ☐

Twice per week [1] ☐

3-5 times per week [2] ☐

Other [3], please

specify:.....

**What did you help him/her with?**

**7.** Did you ask staff to help your partner/relative doing his/her exercise programme? Yes [0] ☐ No [1] ☐ **If yes, please answer the following questions:**

**How often?** Once per week [0] ☐

Twice per week [1] ☐

3-5 times per week [2] ☐

Other [3], please

specify:.....

**Who did you ask?** Nursing staff [0] ☐

Physiotherapy staff [1] ☐

Other [2], please

specify:.....

**What did you need the staff to help your partner/relative with?**

**8.** How difficult/easy was helping your partner/relative to exercise using the website without supervision?

Easy [0] ☐      Neither easy nor difficult [1] ☐      Difficult [2] ☐

**Please provide details. For example, did you worry about helping your partner/relative to exercise properly or knowing how many exercises your partner/relative needed to do?**

**Please tell us about things that went well? What was difficult (if anything)?**
