# Supplementary material for: Personalised Online Upper-Limb Physiotherapy for Stroke Survivors during the Inpatient Phase: A Feasibility Study
Source: Healthcare (Basel). 2023 Sep 19;11(18):2582. doi: 10.3390/healthcare11182582 (PMC10531470; doi:10.3390/healthcare11182582)
Supplement: Supplementary file 1 [file healthcare-11-02582-s001.zip]

Archive with 4 entries (4 files):
- Carers' questionnaire.pdf
- Physiotherapists' questionnaire.pdf
- Stroke survivors' questionnaire .pdf
- TIDieR checklist for the online physiotherapy programme.pdf
